# Supplementary material for: New Insights on Saporin Resistance to Chemical Derivatization with Heterobifunctional Reagents
Source: Biomedicines. 2023 Apr 19;11(4):1214. doi: 10.3390/biomedicines11041214 (PMC10135674; doi:10.3390/biomedicines11041214)
Supplement: Supplementary file 1 [file biomedicines-11-01214-s001.zip › biomedicines-2330980-supplementary.pdf]

**Table S1.** Poisson probability of each number of -SH groups inserted for the different derivatization -SH/RIP ratios.

|      |              | mean derivatization -SH/RIP ratio     |      |      |
|------|--------------|---------------------------------------|------|------|
|      |              | 1.71                                  | 1.98 | 2.52 |
|      |              | Discrete probability (%) <sup>1</sup> |      |      |
|      | -SH inserted |                                       |      |      |
| 2-IT | 0            | 18.1                                  | 13.8 | 8.1  |
|      | 1            | 30.9                                  | 27.3 | 20.3 |
|      | 2            | 26.4                                  | 27.1 | 25.6 |
|      | 3            | 15.1                                  | 17.9 | 21.5 |
|      | 4            | 6.4                                   | 8.8  | 13.5 |
|      | 5            | 2.2                                   | 3.5  | 6.8  |
| SPDP |              | mean derivatization-SH/RIP ratio      |      |      |
|      |              | 1.91                                  | 2.23 | 3.02 |
|      |              | Discrete probability (%)              |      |      |
|      | 0            | 14.8                                  | 10.8 | 4.9  |
|      | 1            | 28.3                                  | 24.0 | 14.7 |
|      | 2            | 27.0                                  | 26.7 | 22.3 |
|      | 3            | 17.2                                  | 19.9 | 22.4 |
|      | 4            | 8.2                                   | 11.1 | 16.9 |
|      | 5            | 3.1                                   | 4.9  | 10.2 |
| SMPT |              | mean derivatization -SH/RIP ratio     |      |      |
|      |              | 1.20                                  | 1.45 | 1.60 |
|      |              | Discrete probability (%)              |      |      |
|      | 0            | 30.1                                  | 23.5 | 20.2 |
|      | 1            | 36.1                                  | 34.0 | 32.3 |
|      | 2            | 21.7                                  | 24.7 | 25.8 |
|      | 3            | 8.7                                   | 11.9 | 13.8 |
|      | 4            | 2.6                                   | 4.3  | 5.5  |
|      | 5            | 0.6                                   | 1.3  | 1.8  |

<sup>1</sup> The probability, that a given number of -SH groups are inserted per RIP molecule in a mixture having a given mean derivatization -SH/RIP ratio, was calculated using the Poisson distribution. The probability was calculated for the three mean derivatization ratios obtained with 2-IT, SPDP or SMPT. The mean derivatization ratios were calculated as described in Materials and Methods.

**Table S2.** Loss of RIP activity, PNAG activity and cytotoxicity of saporin derivatized with 2-IT, SPDP or SMPT with respect to native saporin.

|             | <b>-SH/saporin<br/>inserted</b> | <b>Loss of<br/>RIP activity<br/>(Folds)</b> | <b>Loss of<br/>PNAG activity<br/>(Folds)</b> | <b>Loss of<br/>cytotoxicity<br/>(Folds)</b> |
|-------------|---------------------------------|---------------------------------------------|----------------------------------------------|---------------------------------------------|
| <b>2-IT</b> | 1.71                            | 4.68                                        | 1.11                                         | 4.94                                        |
|             | 1.98                            | 6.50                                        | 1.18                                         | 6.25                                        |
|             | 2.52                            | >7.86                                       | 1.30                                         | 10.9                                        |
| <b>SPDP</b> | 1.91                            | 1.14                                        | 1.03                                         | 1.45                                        |
|             | 2.23                            | 1.23                                        | 1.13                                         | 2.77                                        |
|             | 3.02                            | 1.27                                        | 1.40                                         | 2.86                                        |
| <b>SMPT</b> | 1.20                            | 1.18                                        | 1.13                                         | 1.97                                        |
|             | 1.45                            | 1.41                                        | 1.13                                         | 2.95                                        |
|             | 1.60                            | 1.59                                        | 1.30                                         | 2.99                                        |
